# Supplementary material for: Surveillance of Coxiella burnetii Shedding in Three Naturally Infected Dairy Goat Herds after Vaccination, Focusing on Bulk Tank Milk and Dust Swabs
Source: MDPI journal article supplement (doi:10.3390/vetsci9030102), 2022-02-24
Supplement: s1 [file s1]

# Overview of blood/vaginal swab sampling, kidding seasons and vaccination schedules in three *Coxiella burnetii* positive dairy goat herds (A-C)

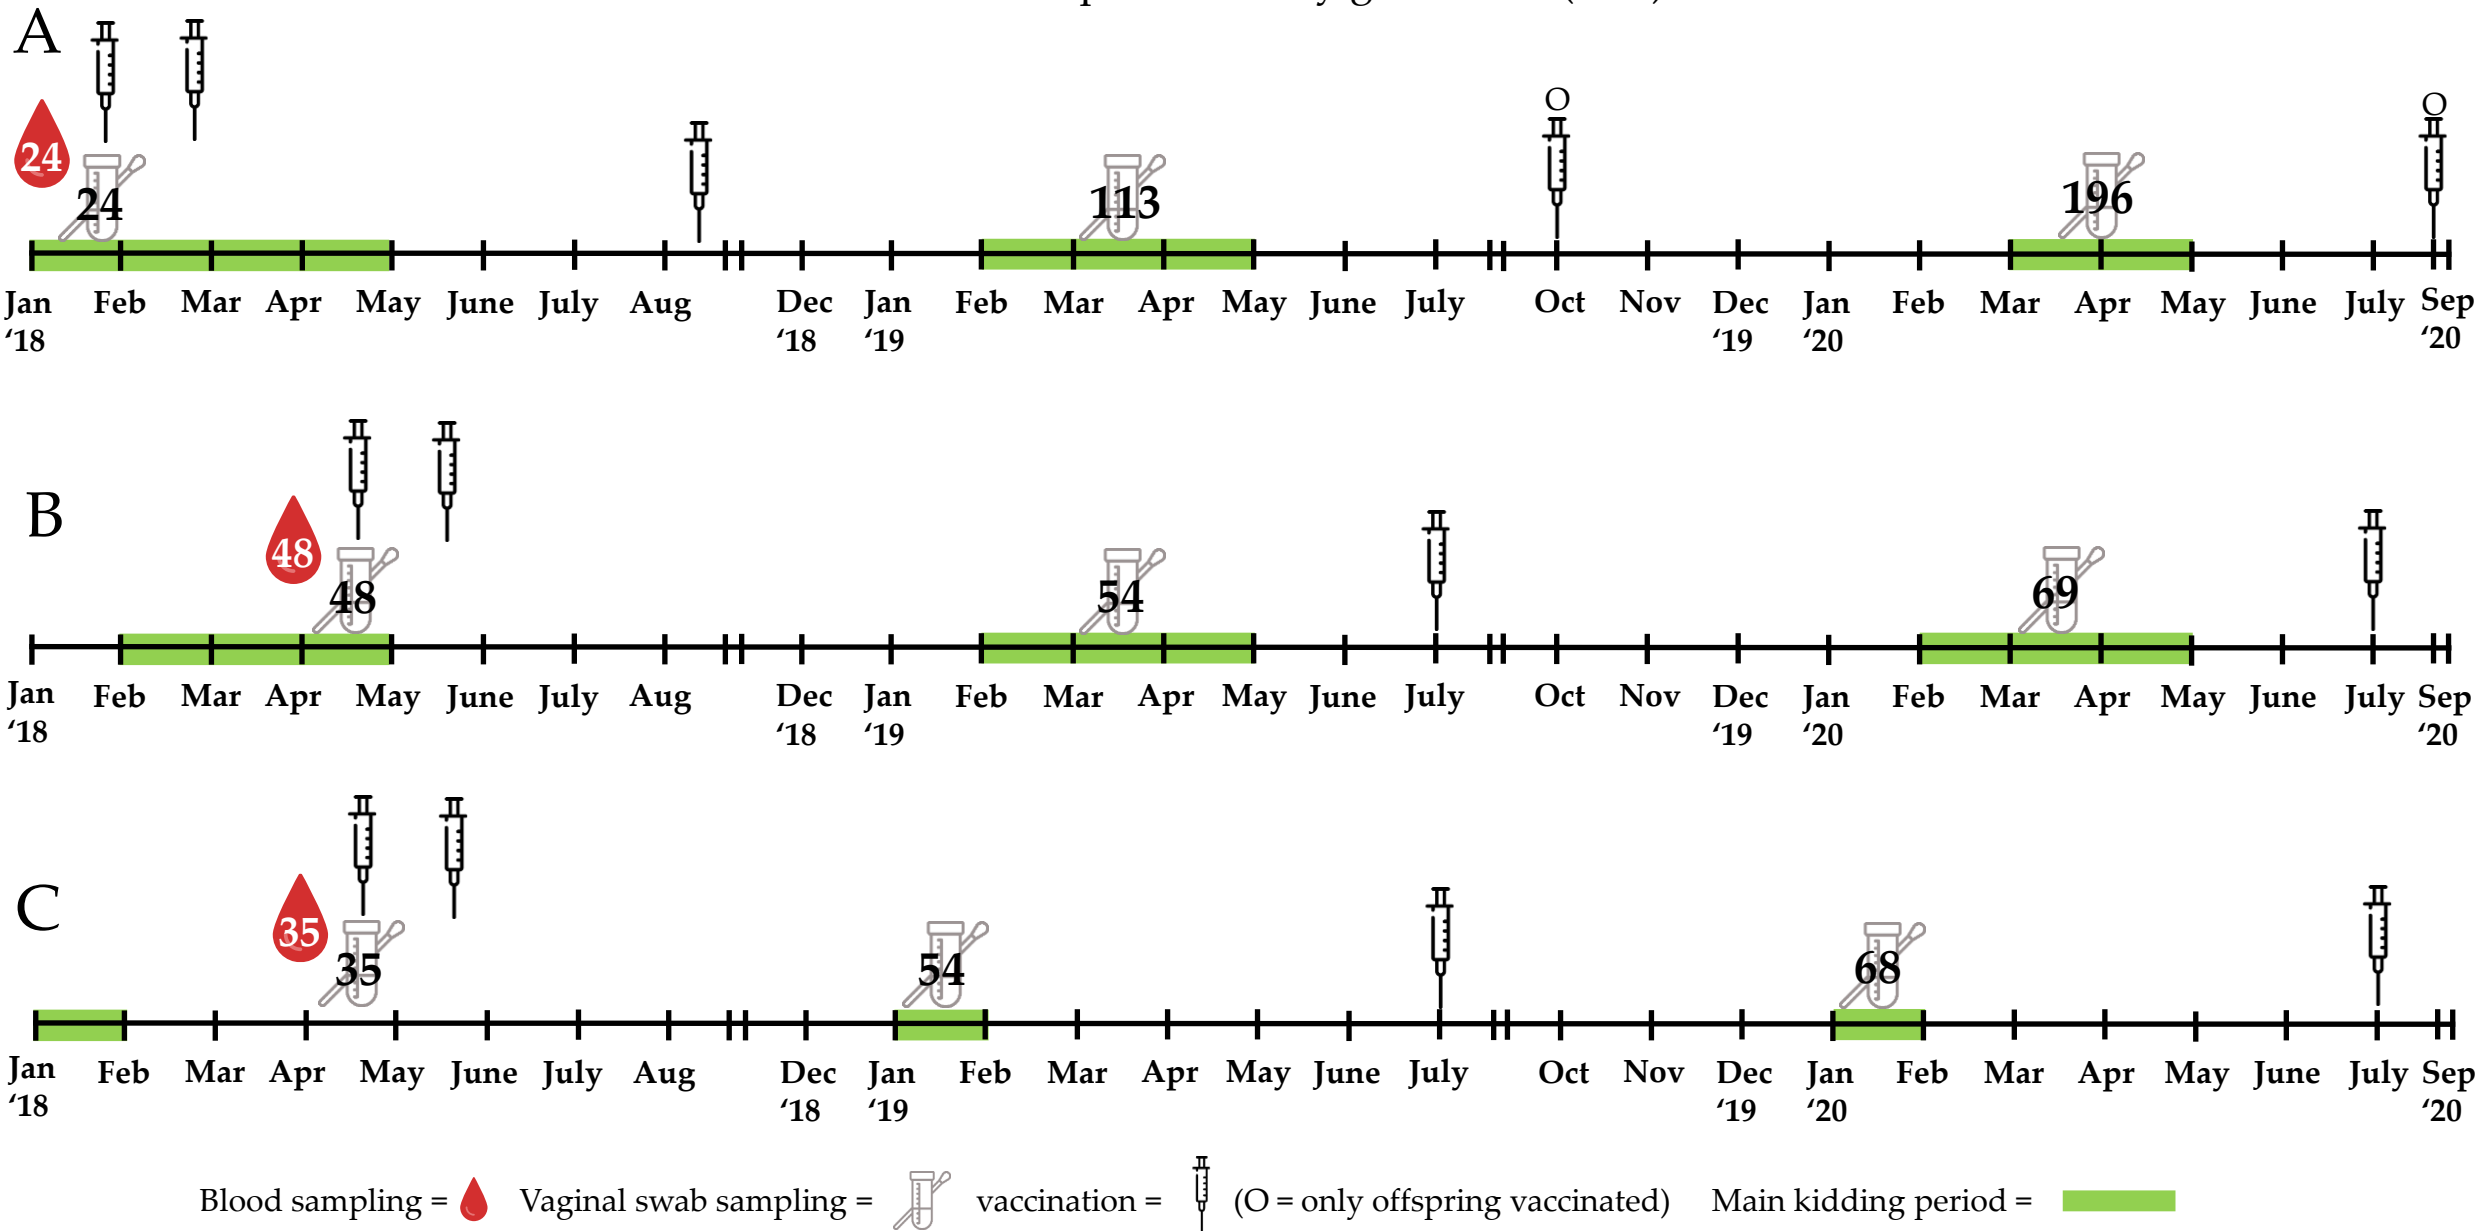

Numbers in symbols indicate sample size
